# Supplementary material for: Differences in Parental Perceptions of Father Support for Breastfeeding and Associated Factors
Source: Research Square preprint supplement (doi:10.21203/rs.3.rs-6897663/v1), 2025-06-29
Supplement: Supplementary file 1 [file cf782de234d6092c2f958986.docx]

**Suppl table1.** Distribution of the Difference Scores for PBIS Items (N = 354)

| **PBIS Subscale** | **Items** | **Difference scores a, mean (SD)** |
| --- | --- | --- |
| **Savvy** | Discuss or negotiate with your partner about how long to continue breastfeeding | 0.39 (1.21) |
| Discuss with your partner ideas for trying to solve breastfeeding problems or make suggestions for creative or different ways to make breastfeeding work better | 0.22 (1.24) |
| Learn more about breastfeeding by reading books or articles on breastfeeding | 0.20 (1.24) |
| Tell your partner your opinion about how long you think that she should breastfeed | 0.35 (1.38) |
| Speak up in support of your partner or defend breastfeeding when someone makes a negative breastfeeding comment | 0.54 (1.16) |
| Help your partner get assistance from others for solving breastfeeding problems or improving breastfeeding | 0.41 (1.19) |
| Remind your partner of the benefits that breastfeeding has for her or for your baby | 0.58 (1.31) |
| Show patience and a willingness to wait for your opportunity to feed the baby. | 0.31 (1.02) |
| Support your partner’s attendance at a breastfeeding support group | 0.37 (1.23) |
| **Helping** | Help out with or take care of other childcare tasks with the baby | 0.18 (1.04) |
| Give something up in order to make breastfeeding easier | 0.59 (1.12) |
| Help out with other household tasks and responsibilities to free up your partner’s time and energy | 0.42 (1.08) |
| Help out with breastfeeding at night | 0.42 (1.16) |
| Care for your baby during and after breastfeeding is done | 0.34 (0.98) |
| Try to improve your partner’s health and nutrition | 0.45 (1.21) |
| Give your partner a break from the baby | 0.43 (1.09) |
| **Appreciation** | Encourage your partner to do her beast when it comes to breastfeeding and let her know that she is not less of a mother if she feels like quitting | 0.05 (1.12) |
| Praise your partner for breastfeeding and let her know that what she is doing is a beautiful, worthwhile thing. | 0.46 (1.21) |
| Let your partner know that breastfeeding is natural and/or give her the message that she is breastfeeding because she wants the best for her baby. | 0.54 (1.29) |
| Listen to and encourage your partner when she is feeling frustrated or discouraged about breastfeeding | 0.37 (1.07) |
| Show appreciation that your partner is breastfeeding | 0.70 (1.41) |
| Tell your partner that you value and support her mothering decisions and intuitions around breastfeeding. | 0.51 (1.20) |
| **Presence** | Try to improve the breastfeeding experience by getting equipment or supplies ready for breastfeeding. | 0.51 (1.19) |
| Act attentively towards your partner during breastfeeding | 0.40 (1.16) |
| Quietly share time and watch or hold your partner during breastfeeding | 0.36 (1.12) |
| Physically help with breastfeeding related activities | 0.64 (1.26) |
| Help create a quiet, pleasant environment for breastfeeding | 0.48 (1.04) |
| Show pleasure and satisfaction while your partner is breastfeeding | 0.90 (1.22) |
| **Responsiveness** | Make it easy for your partner to breastfeed while entertaining company or visiting others. | 0.11 (1.36) |
| Respond sensitively and positively to sexual issues | 0.18 (1.27) |
| Be patient and understanding of the time it takes to breastfeed and don’t get upset if the other housework is not done | 0.33 (.97) |
| Show your comfort with breastfeeding in public and help her feel comfortable too | 0.35 (1.52) |
| Pay attention to how much and how your partner wants you to participate in breastfeeding | 0.85 (1.23) |

Abbreviations:PBIS, the Partner Breastfeeding Influence Scale.

a Difference scores are the scores of paternal perceptions minus those of maternal perceptions
