# Supplementary figures and images for: Differences in Parental Perceptions of Father Support for Breastfeeding and Associated Factors
Source: Research Square preprint supplement (doi:10.21203/rs.3.rs-6897663/v1), 2025-06-29

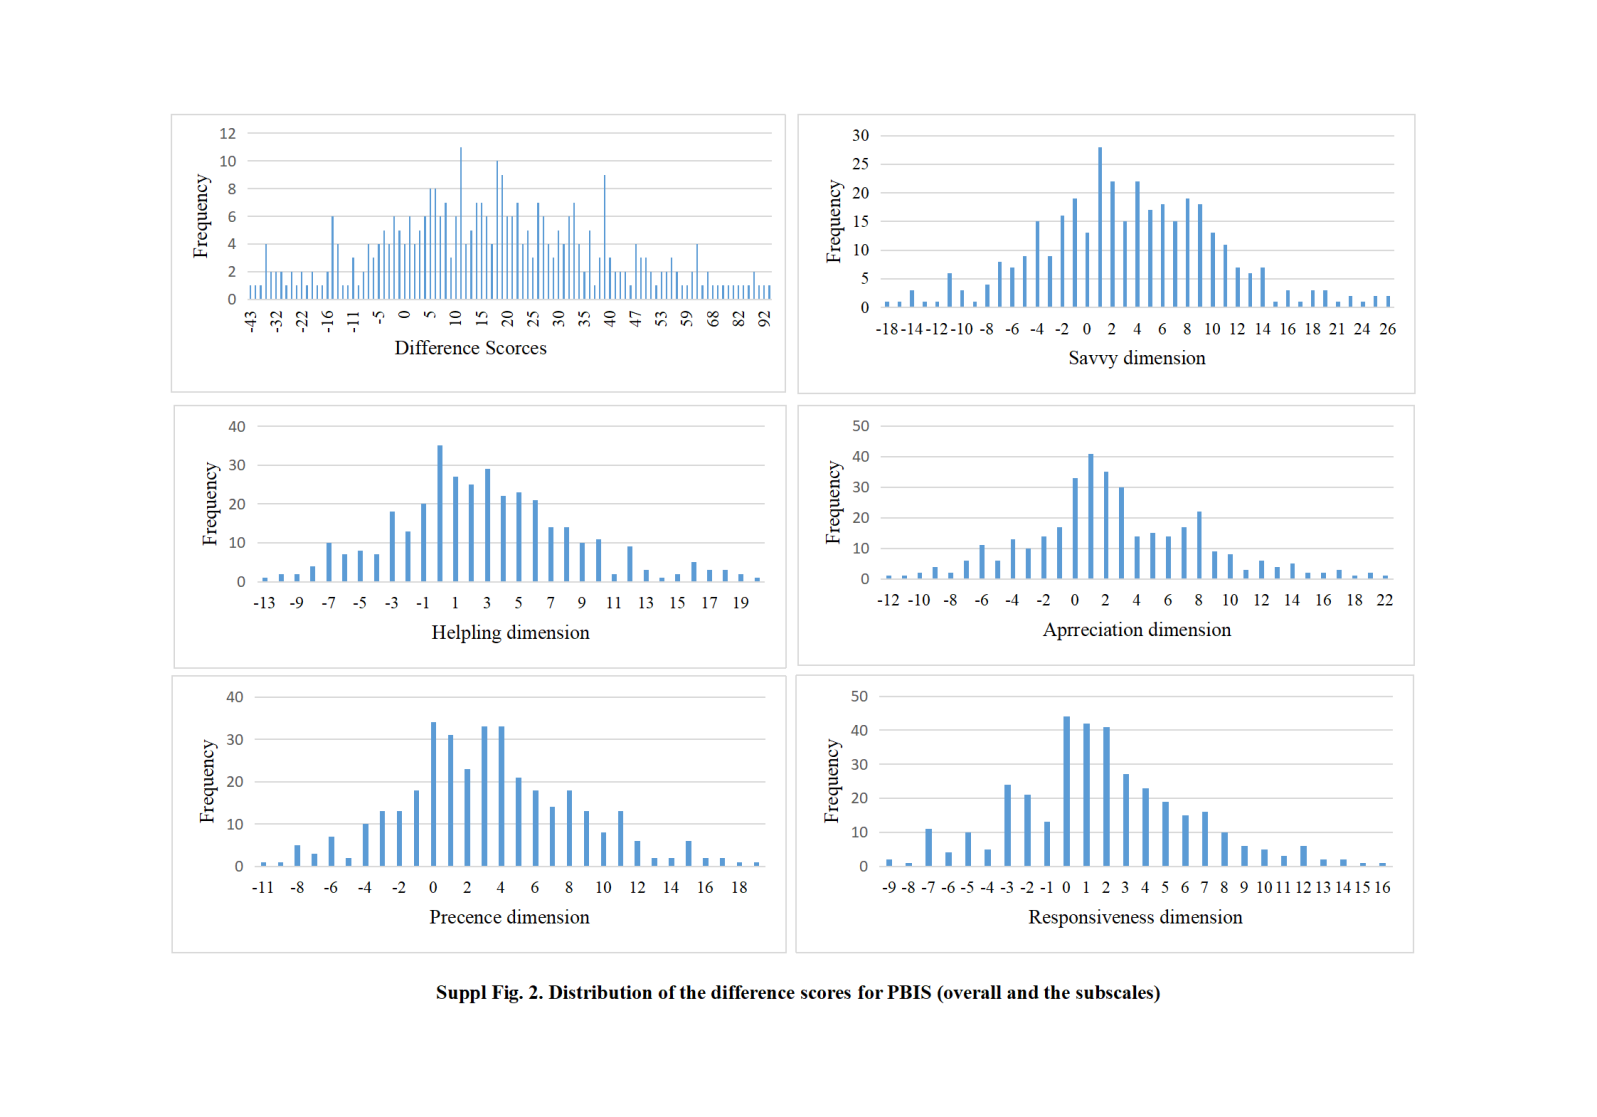


**Suppl Figure 2.** Distribution of the Difference Scores for PBIS (overall and the subscales)

Supplement: Supplementary file 2 [file e8d2bae27ecb12a676a1229e.docx]
